# Supplementary material for: Clustering the autisms using glutamate synapse protein interaction networks from cortical and hippocampal tissue of seven mouse models
Source: Mol Autism. 2018 Sep 15;9:48. doi: 10.1186/s13229-018-0229-1 (PMC6139139; doi:10.1186/s13229-018-0229-1)
Supplement: Supplementary file 1 — Table S1. Sheet 1: Log2 fold change (log2FC) matrices from N = 4 experiments were averaged to generate a single mean log2FC matrix per genotype/tissue type. Cells highlighed in red are ANC-significant, numbers in bold case indicate a fold change greater than 0.25 or less than -0.25. Sheet 2: All hits are sorted by the number of times they appeared as ANC-significant. A red-shaded "1" indicates an ANC-significant hit in a particular model. If a hit was also significant following 5 minutes of glutamate stimulation [32], "yes" is entered into the "Glutamate hit" column. (XLSX 46 kb) [file 13229_2018_229_MOESM1_ESM.xlsx]

## Sheet: All Data
	Shank3B Ctx	Shank3B HC	Shank3d49 Ctx	Shank3d49 HC	Ube3a Ctx	Ube3a HC	VPA Ctx	VPA HC	TSC2 Ctx	FragileX Ctx	CNTNAP2 Ctx
PSD95_PSD95	-0.13211	0.114046	-0.163661	0.218645	0.00593225	-0.006584	-0.24785	0.115056	-0.218392	-0.189344	0.168278
PSD95_NMDAR1	0.109877	0.147106	0.06114	0.101706	0.0061055	-0.0450685	-0.0206315	0.134656	-0.10565	-0.154809	-0.158931
PSD95_NMDAR2A	0.0348357	0.0327585	0.0426013	0.0533185	0.0155265	0.0393825	-0.100812	-0.0332607	0.00615175	0.0295415	-0.197497
PSD95_NMDAR2B	0.0444807	0.101735	0.127319	-0.021201	0.015725	-0.00140275	0.0308942	0.145408	-0.20426	-0.104374	0.261982
PSD95_MGLUR5	-0.019586	-0.0211502	0.0919522	0.026603	0.0241755	-0.0100725	-0.018828	0.094514	0.0387412	-0.0669705	-0.193831
PSD95_SHANK3	-0.0177283	0.527345	0.189134	0.0777115	-0.0287253	0.29226	0.116783	0.067679	-0.153881	-0.005294	-0.0793702
PSD95_HOMER1	-0.03223	0.0319953	0.0177632	-0.0119227	-0.0734912	0.0155615	-0.0145865	0.028235	0.079444	-0.072714	-0.342886
PSD95_HOMER1A	0.0466603	-0.00623717	0.00232625	0.0380925	-0.00170725	-0.0424163	0.0710748	0.0985493	-0.0823653	0.0524022	0.0164995
PSD95_PI3K	-0.149177	0.0307552	0.00453225	0.0634965	0.032408	-0.0445072	0.0848448	-0.0069805	-0.0927117	0.0277367	0.063853
PSD95_FYN	-0.006979	0.0155663	0.0401685	0.0620678	-0.00302725	-0.002232	-0.022941	0.007043	-0.0840165	-0.0465348	0.0435442
PSD95_GLUR1	-0.0720797	0.346702	0.136146	0.0993457	-0.0411595	0.357457	0.00492675	0.0909537	0.0340115	0.0452107	0.162528
PSD95_GLUR2	0.00481275	0.0844512	0.0456213	0.0180233	-0.00058325	-0.0946947	-0.0986325	0.0276275	-0.00980725	0.136868	0.04905
PSD95_SYNGAP	-0.052996	0.207264	-0.0310778	0.023112	-0.022051	0.0670315	-0.00711125	-0.00483875	-0.0901887	0.131303	0.19723
PSD95_SAP97	0.0129502	0.0320417	0.00245125	0.009741	-0.0291885	-0.0684523	-0.0542847	-0.00379275	0.0992433	0.0220898	0.0179323
PSD95_UBE3A	0.0171958	0.0867248	0.0340497	0.009223	0.050058	-0.051116	-0.0208828	-0.009618	-0.004457	-0.001775	0.0215893
PSD95_NL3	0.146623	-0.0314227	0.0730398	0.0164895	-0.00442375	-0.0431228	0.005991	0.0723955	0.155045	-0.0218428	-0.0837762
NMDAR1_PSD95	0.116406	-0.027568	0.119956	0.0649665	0.0083325	-0.00810025	0.0158895	0.142271	-0.0387747	-0.0155613	-0.383968
NMDAR1_NMDAR1	0.004677	-0.136004	-0.0941232	-0.163647	0.067884	0.0397565	-0.280372	0.519481	-0.174127	-0.147203	-0.104365
NMDAR1_NMDAR2A	-0.0579687	-0.0280537	0.044092	0.0209708	-0.00892575	-0.0417028	0.007414	0.008895	0.179104	-0.124214	-0.166213
NMDAR1_NMDAR2B	0.0360955	-0.0148695	0.065297	0.0363075	0.0285895	-0.0211018	0.0325838	0.0747015	0.0258408	-0.0297975	-0.110598
NMDAR1_MGLUR5	-0.25467	-0.286063	0.127562	-0.159584	-0.005883	-0.024833	0.0834543	-0.0731795	0.0918907	-0.0417565	-0.164016
NMDAR1_SHANK3	-0.200085	0.128643	-0.0977883	0.0612567	-0.014167	0.149611	0.158627	0.246769	0.233603	0.202364	-0.650635
NMDAR1_HOMER1	0.0858943	-0.0369798	-0.0300142	0.0220955	0.011895	0.103761	-0.034576	0.0197665	0.0978263	-0.131711	-0.2892
NMDAR1_HOMER1A	-0.019996	-0.0419193	-0.0288483	-0.17872	0.0448195	-0.114969	0.0531358	-0.0847733	0.00096125	-0.0277618	-0.164487
NMDAR1_PI3K	-0.0180333	-0.022424	0.043909	0.105401	-0.016267	0.0241387	0.135077	0.00240225	0.0110295	0.0018995	0.0695935
NMDAR1_FYN	0.0279593	-0.015286	0.0702555	-0.0568272	0.025991	-0.026188	-0.0092065	0.0382975	-0.0288867	-0.0127225	-0.083399
NMDAR1_GLUR1	-0.0420493	0.01191	0.0193622	0.0668023	0.0139285	0.0682248	0.059812	0.0314212	0.0678305	-0.05289	0.003869
NMDAR1_GLUR2	0.105114	-0.0049725	0.0854792	0.125109	-0.035936	-0.0680195	-0.0295995	-0.0191153	-0.0853567	-0.0131625	-0.0288682
NMDAR1_SYNGAP	0.0151248	-0.00582	0.0129217	0.0631822	0.0666613	0.00631375	-0.0990537	-0.00989775	-0.0578407	-0.0541315	0.062843
NMDAR1_SAP97	-0.026613	-0.0292792	0.0387945	0.0410257	0.012066	0.027137	-0.0197945	0.0101963	0.0142133	0.0427908	0.0418393
NMDAR1_UBE3A	0.022171	0.035815	0.0623783	0.093423	0.020631	0.0270598	-0.0172765	0.0582665	-0.0580765	0.0110595	-0.0584677
NMDAR1_NL3	-0.0019485	-0.024437	0.0168162	-0.02941	0.018325	0.030405	0.177472	0.177786	0.00449625	0.250032	-0.137963
NMDAR2A_PSD95	0.05426	0.084969	0.137265	-0.0106275	-0.005162	-0.017946	-0.0563355	-0.0123518	-0.115826	0.00419725	-0.0924847
NMDAR2A_NMDAR1	0.021605	-0.0088865	0.0375202	-0.00505725	-0.0119747	0.0195005	0.0209375	-0.0395265	-0.070188	-0.0487487	-0.347809
NMDAR2A_NMDAR2A	0.0321658	0.00743233	-0.0372283	-0.058998	-0.0266345	0.00022975	0.0261145	-0.0726253	0.0613375	-0.006922	-0.0410008
NMDAR2A_NMDAR2B	0.0915885	-0.0172995	0.146422	0.003789	-0.036687	0.020206	0.0549675	-0.0246585	0.0858575	-0.0304687	-0.166571
NMDAR2A_MGLUR5	-0.0713455	-0.0590712	0.127918	-0.0975447	0.03373	-0.0148143	-0.0021935	-0.098839	0.117451	-0.0939115	-0.159064
NMDAR2A_SHANK3	-0.172084	0.125971	-0.0456343	0.0372952	-0.014069	0.145336	0.185844	0.398863	0.104775	0.040388	-0.23243
NMDAR2A_HOMER1	0.0462653	0.0375002	0.0125732	-0.00480075	-0.0596677	0.0747118	-0.0380578	-0.051143	0.0575405	-0.0204965	-0.394383
NMDAR2A_HOMER1A	0.0578383	-0.000248833	-0.042842	-0.0133402	-0.056816	0.0146668	0.040902	-0.0384198	0.010389	0.11378	-0.146504
NMDAR2A_PI3K	-0.0967695	-0.00695117	0.0310477	0.0261195	0.00808925	-0.0104155	0.00139425	0.021017	-0.0362975	0.0181783	0.03465
NMDAR2A_FYN	-0.027566	-0.0282802	0.0743805	-0.0327383	-0.0736767	-0.00220125	0.00744525	-0.0079695	-0.0014035	-0.0383235	-0.0541175
NMDAR2A_GLUR1	-0.0633655	0.000197667	0.0819982	0.0601052	0.0195535	0.108058	-0.043026	-0.00781625	0.0637705	-0.0117188	0.0465503
NMDAR2A_GLUR2	-0.00050325	-0.0010135	0.0705932	0.003754	-0.0863987	-0.026222	-0.0397768	-0.0345635	-0.0482672	0.0331933	-0.044986
NMDAR2A_SYNGAP	0.035735	0.00650033	0.0560152	0.0630488	0.005008	0.0182022	-0.0530447	-0.0100217	0.0516265	0.0338423	0.052578
NMDAR2A_SAP97	0.00143825	0.0177868	0.0345908	-0.0013145	-0.0433085	-0.0333137	0.0101448	0.00029575	0.00094825	-0.016965	-0.132136
NMDAR2A_UBE3A	0.0395983	0.000178167	0.0921325	0.067592	-0.018552	0.023647	0.00891175	-0.0740455	0.0166963	0.0514107	0.0926935
NMDAR2A_NL3	-0.006761	-0.0365627	-0.0439045	-0.0104335	0.0418525	0.0391152	0.251369	0.245256	0.0462957	0.258045	-0.143419
NMDAR2B_PSD95	0.0478652	0.0218387	0.0265723	-0.0092615	-0.03419	0.173165	0.0368832	0.105945	-0.0107203	-0.0324995	-0.267313
NMDAR2B_NMDAR1	-0.013428	0.0174855	0.0102138	0.0365302	0.0504032	-0.0688007	0.0303612	0.105839	0.0265272	-0.0784087	-0.396337
NMDAR2B_NMDAR2A	0.0344547	0.0436203	-0.0237467	-0.0507927	0.0307037	-0.0543665	0.0359497	0.018332	0.152666	0.00872225	-0.194265
NMDAR2B_NMDAR2B	-0.154078	-0.0234092	-0.0924862	-0.0137198	0.0240132	0.02161	0.209702	0.499281	-0.463607	-0.133776	0.029234
NMDAR2B_MGLUR5	-0.0382608	-0.16557	0.0443578	-0.0559813	0.0075705	-0.00128375	-0.037384	0.0116182	0.168414	-0.0390207	-0.0753603
NMDAR2B_SHANK3	-0.156907	0.146679	-0.0076075	0.0424967	0.0213298	0.0962115	0.196673	0.174504	0.190201	0.131006	-0.491009
NMDAR2B_HOMER1	-0.00965875	0.0196363	0.023942	0.0128512	-0.0053365	0.037386	0.0312775	-0.0610517	0.132648	-0.0418605	-0.322542
NMDAR2B_HOMER1A	0.009963	0.0236923	0.0148345	-0.0239252	0.101125	0.0645975	0.078695	0.00944425	0.05176	0.0687715	-0.277766
NMDAR2B_PI3K	0.0180382	0.0321597	0.0878633	0.0257255	0.03688	-0.0373727	0.0367003	0.0141867	-0.0387275	-0.0602828	0.105284
NMDAR2B_FYN	0.029922	-0.0358022	0.0205513	-0.00227625	-0.0229633	-0.029284	-0.00646	-0.0509545	0.000751	-0.05214	-0.096532
NMDAR2B_GLUR1	0.0315335	0.0289153	0.107348	0.032092	-0.0178755	-0.0359225	0.038139	0.0664915	0.0242438	0.0902948	0.0664345
NMDAR2B_GLUR2	0.0577852	0.0393	0.0281082	0.0624523	-0.0708007	-0.128563	-0.0412335	0.0121315	-0.005077	0.0573922	0.0953892
NMDAR2B_SYNGAP	0.00496225	0.00856483	0.0502408	0.0276477	0.0733045	-0.0356745	-0.00686025	-0.012055	-0.045789	0.0818393	0.0706575
NMDAR2B_SAP97	0.0461507	-0.0662562	0.0120162	0.014481	0.0149073	-0.0031755	-0.00582025	0.0090665	0.168954	0.054054	-0.121601
NMDAR2B_UBE3A	0.00928525	0.0213318	0.0508593	0.073495	0.055508	-0.0621665	0.00624575	0.0157557	-0.0151525	-0.02046	0.0566455
NMDAR2B_NL3	-0.0352785	-0.001557	-0.0193518	0.03187	0.11126	-0.005769	0.201288	0.175661	0.105894	0.184933	-0.066416
MGLUR5_PSD95	0.101992	0.0051395	0.0101265	-0.0286838	0.0035175	-0.0464808	0.00780475	0.039901	-0.030018	-0.0836105	-0.499943
MGLUR5_NMDAR1	0.017274	0.0578188	0.018195	0.0153495	0.0121948	0.024161	0.0527855	0.0486653	0.069244	-0.0451017	-0.555853
MGLUR5_NMDAR2A	-0.0057575	0.0097085	0.0227455	-0.0280918	-0.0287022	-0.070545	-0.016592	0.00140125	0.0850935	-0.104251	0.0133145
MGLUR5_NMDAR2B	-0.0135955	0.0203993	0.0124832	0.0308287	-0.0206435	0.00493975	-0.0162215	0.0442153	0.0838472	-0.0519937	-0.26386
MGLUR5_MGLUR5	-0.0190685	-0.0238993	0.0553912	-0.007953	-0.0684073	-0.0951775	0.0453493	0.0330618	0.018935	-0.152162	-0.147738
MGLUR5_SHANK3	0.0210235	0.080149	0.030146	-0.0541258	-0.0656763	0.182316	-0.021709	0.0554043	0.0411657	0.004534	-0.460632
MGLUR5_HOMER1	-0.095292	0.0449697	-0.0235435	-0.006104	-0.0393148	0.006663	-0.0254583	0.018662	0.180353	-0.103685	-0.411708
MGLUR5_HOMER1A	0.018677	-0.0248552	-0.0343442	0.027647	-0.0126563	0.017081	-0.0351325	0.0452562	0.00520825	-0.0596373	-0.346927
MGLUR5_PI3K	-0.0299805	0.0836732	-0.0611133	0.05187	-0.0160995	-0.0290855	0.056317	0.0056465	-0.0322303	0.047844	-0.0520483
MGLUR5_FYN	0.0236952	-0.0168687	-0.106231	0.0252255	-0.015328	0.0394658	-0.00729425	0.026033	-0.0608057	-0.0528732	-0.0832937
MGLUR5_GLUR1	-0.069283	0.0343558	0.0115805	0.0819448	-0.0377458	0.0161775	0.0219757	0.032936	0.0750388	0.0492505	-0.0327902
MGLUR5_GLUR2	0.0552538	0.0149155	-0.047422	0.064441	-0.0548425	-0.0537435	-0.0380725	0.0062135	-0.0410737	0.079221	-0.05175
MGLUR5_SYNGAP	-0.00245325	0.002033	0.0260855	0.0378515	0.0051235	0.0426643	-0.0346047	0.0196022	0.0592635	0.0421468	0.0116002
MGLUR5_SAP97	0.0946922	-0.010848	0.0156743	0.014357	-0.032331	0.029059	0.00279675	-0.0250993	0.02573	0.0119403	-0.0177373
MGLUR5_UBE3A	0.15165	0.0437975	-0.0177542	0.0362193	-0.0481115	-0.0080125	-0.0067785	-0.062135	0.0477233	-0.0166813	-0.01774
MGLUR5_NL3	0.0173872	-0.0363235	-0.0273295	-0.0220282	0.0582245	0.00726725	0.00061275	0.0679665	0.194465	-0.0668267	-0.282347
SHANK3_PSD95	0.0181475	0.0497305	0.0028965	0.0599912	0.110958	0.282604	-0.081674	0.228872	0.0089365	-0.109175	-0.108545
SHANK3_NMDAR1	0.166157	-0.0770592	0.0236952	0.113597	0.000626	0.032477	-0.0225012	0.227508	0.22582	0.294608	-0.310639
SHANK3_NMDAR2A	0.033143	-0.010372	0.0846223	-0.0872385	-0.00310525	0.041064	-0.048553	0.0135192	0.119434	0.086405	-0.178726
SHANK3_NMDAR2B	0.0189283	0.0177197	0.027068	-0.124403	-0.0119535	0.0693187	0.119995	0.248528	0.178658	-0.0301743	-0.162237
SHANK3_MGLUR5	0.104563	-0.0399888	0.14696	0.005732	-0.00703325	0.137951	0.0357873	0.0254842	0.283701	0.0482748	-0.102936
SHANK3_SHANK3	-0.369957	-0.0680198	-0.231506	-0.212384	0.0186257	0.326405	0.106221	0.008291	0.073125	0.106584	-0.238763
SHANK3_HOMER1	0.019978	0.0929965	-0.0500828	-0.165225	0.005834	0.0220145	-0.128352	-0.155016	0.100974	-0.027181	-0.322324
SHANK3_HOMER1A	0.0647595	0.0535108	-0.142535	0.119309	-0.0192815	0.0535028	0.033991	0.0141358	0.111945	0.0376415	-0.24815
SHANK3_PI3K	-0.0309572	-0.0352137	0.0905482	0.127589	-0.00641925	0.0434103	0.0778973	-0.0733072	0.0305392	0.142866	0.0195905
SHANK3_FYN	-0.0129705	0.0619995	0.073808	-0.0281575	-0.0915973	0.00275225	-0.0173623	0.0832982	0.0109562	0.0101803	-0.0273153
SHANK3_GLUR1	0.00546275	0.0369622	0.0843612	0.102564	0.029098	0.367364	-0.0854065	0.0955185	0.117683	0.096953	-0.0077625
SHANK3_GLUR2	0.0803627	0.0981853	0.0610172	0.185209	-0.070257	-0.0415388	-0.133996	-0.00659625	0.0611138	0.101529	-0.0158792
SHANK3_SYNGAP	-0.017133	0.0246748	0.0140613	0.078801	0.007133	0.0576345	-0.047893	-0.0212673	0.119172	-0.0768847	0.125154
SHANK3_SAP97	0.028887	0.0748692	0.045967	0.0836642	0.078245	0.0588147	-0.00779975	-0.00225775	-0.0115738	0.176005	-0.100526
SHANK3_UBE3A	0.05883	-0.0102693	0.0692855	0.114086	0.016556	-0.0156185	-0.077738	0.153288	0.043082	0.0811935	-0.00617875
SHANK3_NL3	-0.0532237	0.0173307	-0.00370325	-0.0332065	0.044662	0.0517138	0.278555	0.271984	0.0072225	0.134284	-0.139598
HOMER1_PSD95	0.370127	0.236978	-0.209321	0.389016	-0.0357442	0.121971	0.702085	1.05671	0.124284	-0.113665	0.516802
HOMER1_NMDAR1	0.411556	0.151126	-0.053505	0.24413	-0.013501	0.104566	0.369022	0.933937	-0.0418135	-0.212033	0.141465
HOMER1_NMDAR2A	0.0300727	0.0347805	-0.0646842	0.0031245	0.013256	-0.0051795	0.00909575	-0.0435612	0.168512	0.0663283	-0.196427
HOMER1_NMDAR2B	0.202136	0.376114	-0.00332225	0.129541	-0.0383088	0.00135975	0.451926	0.972739	0.0392287	-0.0469393	0.107716
HOMER1_MGLUR5	-0.0396437	-0.0106378	0.0219838	0.03625	-0.06483	-0.32989	0.0863548	0.20328	0.0305582	-0.0210225	0.198401
HOMER1_SHANK3	0.0628752	0.0534388	-0.0363365	-0.0149622	-0.0414477	-0.137019	0.265358	0.242453	0.206843	0.103008	-0.0160605
HOMER1_HOMER1	-0.0256238	-0.0026915	0.058468	0.0608582	-0.00949275	0.092089	0.0346463	0.0497912	-0.0559673	-0.013146	-0.051601
HOMER1_HOMER1A	0.0432348	0.0576975	-0.0492983	-0.12842	-0.00684875	0.130163	0.100097	-0.0040575	-0.0259353	-0.00380725	-0.0033865
HOMER1_PI3K	-0.111381	0.0462042	0.0118475	0.0532555	3.125e-05	-0.0861858	0.082251	-0.013548	-0.0529855	0.0190115	0.156713
HOMER1_FYN	-0.031333	0.0692958	-0.0168083	0.0466535	0.00485175	-0.0616208	-0.0120907	0.0569648	-0.0351805	-0.0582177	0.0487037
HOMER1_GLUR1	-0.050737	0.0151463	0.0505195	0.02147	-0.0330838	0.0616128	0.0626213	0.050356	-0.0369987	0.0664285	0.139225
HOMER1_GLUR2	0.0426602	0.10169	0.005941	0.0343052	-0.0418347	-0.205336	0.0129102	-0.058763	0.0103347	-0.001536	0.0169823
HOMER1_SYNGAP	0.114396	0.616521	-0.0370805	0.0977248	-0.0095555	0.00536875	0.014869	0.0963895	-0.0728105	-0.0135938	0.168433
HOMER1_SAP97	-0.0498965	0.064537	0.0213765	0.0180973	-0.0339002	-0.0537052	0.004881	-0.00915225	0.145818	-0.0174702	0.0113172
HOMER1_UBE3A	0.013223	0.0600998	0.0161097	0.068904	-0.00293675	-0.0850667	-0.0453527	0.255736	0.0605113	0.055417	0.0942318
HOMER1_NL3	0.167039	0.0347767	0.0666723	0.04974	0.043295	0.018329	0.0639715	0.06	0.0750815	-0.0342655	0.0209617
PI3K_PSD95	0.0328592	0.00119	-0.0495403	0.128673	0.04038	-0.0233218	-0.0282153	0.202616	0.235866	-0.144697	-0.208049
PI3K_NMDAR1	-0.12405	-0.0403172	-0.108558	0.263661	0.0306875	-0.0142015	0.0691017	0.215555	0.0437773	-0.088016	-0.100547
PI3K_NMDAR2A	0.0757598	-0.127245	-0.076569	0.0074295	0.0248333	0.0196725	-0.0150882	0.159073	0.0383027	-0.124389	-0.126239
PI3K_NMDAR2B	0.0834442	0.087701	-0.00173775	0.0173878	0.0675468	0.00483825	0.0630363	0.14887	0.120925	-0.0295787	-0.053806
PI3K_MGLUR5	-0.164171	-0.153091	-0.0434085	0.187044	-0.0447767	-0.0767417	0.138003	0.202323	-0.130126	-0.183038	0.12838
PI3K_SHANK3	0.0768453	0.0390453	0.0483335	0.074073	0.0525878	0.0398135	0.165452	0.0920293	-0.0076955	0.003841	-0.185764
PI3K_HOMER1	0.0404435	0.026615	0.0008885	0.0532178	0.0201542	0.00153975	0.0242497	0.124791	0.154578	-0.147076	-0.213753
PI3K_HOMER1A	-0.106313	0.025159	-0.178342	0.055421	-0.0261452	0.0188982	0.175636	0.298672	-0.11614	-0.129188	0.00224525
PI3K_PI3K	-0.0895265	-0.0636822	0.023864	0.0959765	0.0892218	0.417245	0.0939467	0.118199	0.02719	-0.105059	-0.141756
PI3K_FYN	-0.117419	-0.1024	-0.0266073	-0.0402215	0.00724075	-0.0409965	0.0805445	0.0677325	0.050312	-0.0465417	-0.0691623
PI3K_GLUR1	-0.087919	0.0204735	0.050996	0.181338	0.029765	0.0221428	0.0199853	-0.00505275	0.0858373	0.00274025	0.023409
PI3K_GLUR2	0.0164892	0.021674	0.0316145	0.206791	-0.0161075	-0.055448	-0.0167198	0.0760568	0.013469	0.061016	-0.0147347
PI3K_SYNGAP	-0.0540517	0.024401	0.0721688	0.237234	-0.0117073	0.0316753	0.0567937	0.0115708	0.0569815	-0.0264488	0.032274
PI3K_SAP97	0.011908	0.0473875	0.0665522	0.234496	0.0219605	-0.021235	0.011068	-0.0141923	0.0829572	0.0639745	-0.0407655
PI3K_UBE3A	0.0033	0.0597285	0.0489977	0.176442	0.0511955	-0.0634215	0.03417	0.0676578	0.100223	0.046917	-0.0092185
PI3K_NL3	0.234375	0.0410465	-0.00615575	0.205817	0.0391242	-0.00906975	0.00325475	0.192963	0.076226	-0.0484795	-0.055775
FYN_PSD95	0.0892622	0.0347655	0.0673635	-0.00445025	-0.0110745	0.0200925	0.0102752	0.093647	0.123609	-0.0572758	-0.374327
FYN_NMDAR1	0.00357925	-0.0100218	0.0046645	0.0773573	-0.0118237	-0.0406818	0.0900597	-0.0332145	0.151746	-0.0670375	-0.28471
FYN_NMDAR2A	0.0748525	0.011193	-0.0268358	-0.0881	-0.018773	0.0767132	-0.055889	-0.0281405	0.137721	0.0261223	-0.166709
FYN_NMDAR2B	0.282167	-0.0687572	-0.200896	-0.375067	0.0327475	0.0220227	0.144395	0.0603018	0.313628	0.0304838	-0.198615
FYN_MGLUR5	-0.1303	-0.112987	-0.0344902	-0.139836	-0.0198745	-0.0129745	-0.0266773	-0.0702983	0.0580362	0.14012	-0.138818
FYN_SHANK3	-0.104083	0.148968	0.079677	0.072074	0.00875075	0.113922	0.237026	0.275824	0.193759	0.194074	-0.53575
FYN_HOMER1	0.0533955	0.0234145	-0.049251	-0.008982	-0.0336337	0.0322042	0.00843125	0.0007855	0.122664	-0.0475155	-0.371814
FYN_HOMER1A	0.0920025	-0.000338667	-0.11402	-0.169757	-0.018403	0.027384	0.134194	0.077548	0.0849835	0.177769	-0.207822
FYN_PI3K	-0.10988	0.0270397	0.11405	0.0498872	-0.0450472	0.0152067	0.016956	-0.0178405	-0.0588502	0.00181125	0.117272
FYN_FYN	-0.00129225	-0.200555	0.116761	-0.0286135	-0.00230075	0.136953	0.213819	0.038967	-0.0347765	0.152169	0.294328
FYN_GLUR1	0.0051545	0.0333627	0.224777	0.115966	0.0168498	0.0102122	0.06871	0.0582265	-0.0466063	0.102445	0.035456
FYN_GLUR2	0.00075325	0.10167	0.143485	0.078619	-0.0236032	-0.076368	-0.11492	0.00127275	-0.0097175	0.0606043	0.0193998
FYN_SYNGAP	0.0295635	0.076878	0.067876	0.0193593	0.0111053	-0.0014485	-0.109947	-0.0417397	0.0168185	0.0518287	0.14547
FYN_SAP97	0.0334878	0.038103	0.0960697	0.0982112	-0.0398167	0.008079	0.0370647	-0.0573535	0.1121	-0.0310905	-0.059363
FYN_UBE3A	0.00030475	0.0689922	0.246305	0.0693122	-0.0234232	-0.0616142	-0.094173	-0.0214423	-0.0080325	-0.0194077	0.002301
FYN_NL3	-0.170571	-0.0103895	-0.0693157	-0.022933	0.0301655	0.00062175	0.341156	0.231424	0.266335	0.11151	-0.11701
GLUR1_PSD95	-0.0178078	-0.0820522	0.0386505	-0.121492	-0.140883	-0.0850275	-0.152856	-0.130736	0.0606963	-0.0978462	-0.0032655
GLUR1_NMDAR1	0.094208	-0.0347767	-0.0621953	0.0830203	0.00367325	-0.00790725	-0.0257	0.022775	-0.0494658	-0.0140195	-0.104316
GLUR1_NMDAR2A	0.00106275	-0.0694043	0.0319212	0.0064115	-0.0429045	0.021401	0.0126438	0.00028775	-0.0075255	-0.1241	-0.0110413
GLUR1_NMDAR2B	-0.00711425	-0.0213367	0.024602	-0.0437135	-0.007007	-0.0507862	0.0618962	0.059032	0.0566575	-0.0561017	0.051739
GLUR1_MGLUR5	-0.056395	-0.161195	-0.207029	-0.00319425	-0.09345	-0.00182475	-0.110033	-0.019764	-0.0539458	-0.183299	-0.0222238
GLUR1_SHANK3	-0.01756	0.0480822	0.0750945	0.0069835	0.0406437	0.0774428	0.0341975	0.148762	0.0670142	-0.0230038	-0.21281
GLUR1_HOMER1	-0.00113725	-0.0610668	0.0389305	0.0151412	0.0353745	0.0452225	0.031877	0.0137232	0.110786	-0.0966785	-0.192867
GLUR1_HOMER1A	-0.00514025	0.022868	-0.152894	0.000788	0.0653953	0.0152583	-0.0467647	-0.0426505	0.029956	0.149112	-0.0293633
GLUR1_PI3K	-0.0146105	0.00535967	-0.037665	0.0638495	-0.0544053	-0.0442068	0.065874	-0.0131432	-0.139043	-0.0185147	0.103286
GLUR1_FYN	0.0287248	0.000171167	-0.0478035	-0.0474678	0.0109975	0.002219	0.0221415	0.0176842	-0.0750832	0.0437595	-0.0104042
GLUR1_GLUR1	0.00273975	0.0631407	0.0123395	-0.135375	-0.020807	0.112192	0.121242	0.0564015	0.0383812	-0.0319603	0.0528778
GLUR1_GLUR2	0.0366175	0.0244628	-0.064435	0.122521	-0.0951945	-0.0553302	0.0364177	-0.130631	0.532261	-0.286701	-0.013615
GLUR1_SYNGAP	0.0837307	0.0295493	-0.069742	0.0926118	-0.0273033	0.086132	-0.0497357	-0.0186418	-0.00079675	0.005436	0.0424233
GLUR1_SAP97	0.0221707	-0.0155057	0.0203848	-0.000964	-0.0681785	-0.0108513	-0.0699595	0.019237	-0.0254435	-0.0206833	-0.018902
GLUR1_UBE3A	-0.0265662	0.0394837	0.0269232	0.0437857	-0.0288417	0.011405	-0.0443627	-0.0241943	-0.033853	-0.0224422	-0.129654
GLUR1_NL3	0.0344342	-0.0311775	0.0351385	0.0578582	0.106831	0.007922	0.0858887	0.1213	0.127405	-0.139883	-0.0927965
GLUR2_PSD95	0.112511	0.037253	0.198293	-0.0362623	-0.0421788	0.0873175	-0.035957	0.0310755	0.0778272	0.0250882	-0.26262
GLUR2_NMDAR1	0.0294763	0.0320928	0.0211728	0.0404427	0.0363863	0.00632	-0.00195675	0.0150187	0.0745167	-0.0698577	-0.331082
GLUR2_NMDAR2A	-0.059492	0.00510617	0.016674	-0.00151175	0.01211	0.0544057	0.032573	0.0164108	0.0267182	-0.131965	-0.0549665
GLUR2_NMDAR2B	0.0443527	0.0241577	0.0581378	-0.039272	0.0595695	0.039405	-0.00669925	0.0228407	0.146168	-0.0404995	-0.153645
GLUR2_MGLUR5	0.0004185	-0.0704555	0.0510425	0.082149	-0.0177655	0.040838	0.00055125	0.1389	0.0241413	-0.0658025	-0.172845
GLUR2_SHANK3	0.0350167	0.069003	0.158568	0.0478367	-0.0507017	0.204049	0.0670083	0.0954052	0.071864	-0.0249537	-0.394026
GLUR2_HOMER1	-0.0563018	-0.00420417	0.0153695	0.0235275	-0.0245017	0.0235323	0.047973	0.00332875	0.067822	0.0713402	-0.245781
GLUR2_HOMER1A	0.0178475	0.0131672	0.015992	0.0673125	-0.0230808	-0.0225453	-0.019693	0.0485152	0.0421295	-0.0163627	-0.180788
GLUR2_PI3K	-0.0695837	0.0458342	0.0205825	0.0106265	-0.0179915	0.0100155	0.151043	0.080258	-0.15944	-0.0034945	0.001486
GLUR2_FYN	-0.0041975	0.0405645	-0.0011015	0.0268772	0.0210348	0.00392275	0.032056	-0.0603905	-0.039644	-0.0315462	-0.0507187
GLUR2_GLUR1	0.0383802	-0.0587862	-0.00084575	-0.0913633	0.009698	0.150101	0.0368622	0.106445	-0.008442	0.033228	0.0556633
GLUR2_GLUR2	-0.041592	0.092707	0.0640645	0.120815	-0.116329	-0.0323655	-0.146079	-0.0823107	0.157506	-0.214012	-0.0904237
GLUR2_SYNGAP	0.0848535	0.000977167	0.0589952	-0.0209505	0.0463595	0.0555355	0.0401252	0.0001115	-0.0488177	0.0526957	0.0312335
GLUR2_SAP97	0.0665353	0.0348298	0.0447007	0.0188585	0.0392585	-0.0443885	0.0305153	-0.0418085	-0.0053745	-0.0198697	-0.0183628
GLUR2_UBE3A	0.00438475	0.0135042	-0.0557685	0.00880575	-0.0191555	0.0841522	0.0326253	0.0122372	0.00178075	0.0331947	0.0895637
GLUR2_NL3	0.190045	-0.0278072	-0.00393575	0.00072575	-0.0129958	-0.01229	0.13934	0.067689	0.170366	0.0173685	-0.121575
SYNGAP_PSD95	0.143075	0.15487	-0.227222	0.012167	-0.100616	0.0332877	-0.126375	0.113946	-0.960816	-0.218867	-0.0264252
SYNGAP_NMDAR1	-0.0874792	-0.0245847	-0.274391	-0.167852	0.0354203	0.281366	-0.100469	-0.0351637	-0.487422	-0.160591	0.041935
SYNGAP_NMDAR2A	0.105362	0.0163678	0.00759475	-0.266195	-0.0857432	-0.0301505	-0.0101952	0.185956	0.545568	0.005643	0.0192093
SYNGAP_NMDAR2B	0.154443	0.120041	0.0727437	-0.0772937	0.038156	-0.0214522	0.204996	0.508483	0.23599	-0.242557	0.0269673
SYNGAP_MGLUR5	-0.152827	-0.0976547	0.006802	0.151507	0.00568375	-0.0410512	0.26237	0.379875	0.566724	-0.0980445	0.0672055
SYNGAP_SHANK3	0.0893557	0.137719	0.167386	0.00212925	-0.03735	0.203132	0.207256	0.103827	0.330371	-0.103625	-0.0841135
SYNGAP_HOMER1	0.0515615	0.0746357	-0.0054535	-0.0308115	-0.00652675	0.0601648	-0.023528	0.0223438	0.0778598	-0.226386	-0.211897
SYNGAP_HOMER1A	0.0832772	0.0900497	-0.254567	-0.167476	0.0432107	0.0197853	0.0590252	0.231855	-0.0482498	-0.247454	-0.0251335
SYNGAP_PI3K	-0.101893	0.0397778	0.0897577	0.162517	-0.0079655	0.0134105	0.160139	0.0163575	0.134744	-0.106051	0.159631
SYNGAP_FYN	-0.0778878	-0.00229783	0.088384	-0.0823748	-0.0892073	-0.0047425	0.239927	0.181034	0.0571972	-0.235065	0.0294405
SYNGAP_GLUR1	0.145907	0.108666	0.107873	0.189223	0.0129955	0.0910048	0.093865	0.0723145	0.203938	0.177304	0.027665
SYNGAP_GLUR2	0.0975665	0.167476	0.115706	0.244111	-0.0584503	-0.0307032	0.0391492	0.115979	0.167923	0.15835	0.0367795
SYNGAP_SYNGAP	-0.105538	0.0734078	-0.20312	-0.13916	-0.0946572	0.191545	0.004873	-0.24578	-0.812346	-0.0936975	-0.130252
SYNGAP_SAP97	0.114754	0.0879638	0.034114	0.104423	-0.00761325	0.008514	0.128095	0.145477	0.280547	0.183165	0.007574
SYNGAP_UBE3A	0.159018	0.106576	0.144102	0.177489	-0.032993	-0.0743507	0.0220788	0.177947	0.11726	0.0784417	-0.0141708
SYNGAP_NL3	0.382329	0.0685197	-0.048954	-0.0481092	0.0996775	-0.0173678	0.19808	0.173123	0.191846	-0.185072	0.019323
SAP97_PSD95	-0.078163	-0.000555167	-0.0367335	0.0537877	-0.0738458	0.151391	0.0189872	0.0783162	0.158256	-0.297148	0.00805325
SAP97_NMDAR1	0.03748	-0.0292077	-0.0559725	0.0454418	0.0178285	0.389139	0.221795	0.447901	0.175327	-0.180344	-0.299345
SAP97_NMDAR2A	-0.0318925	0.0489612	0.020149	-0.124747	0.00052375	0.12237	0.0252015	0.0399765	0.189279	-0.0795558	-0.320524
SAP97_NMDAR2B	0.0244893	0.104661	0.05718	0.0756348	0.0241902	0.248841	0.374131	0.408009	0.390401	-0.118564	-0.0954675
SAP97_MGLUR5	-0.0610567	0.0096185	0.0535858	0.113872	0.002166	0.236079	0.0711847	0.0768902	0.219426	-0.134192	-0.154748
SAP97_SHANK3	-0.006991	0.240313	0.0765845	-0.00590175	-0.0495828	0.323472	0.149105	0.0372015	0.105983	0.0667713	-0.248464
SAP97_HOMER1	0.030754	0.104878	0.0860112	-0.009633	0.068079	0.115385	0.029664	0.099557	0.159711	-0.0336347	-0.316786
SAP97_HOMER1A	0.0681198	0.0668547	-0.170575	0.113968	0.0242715	-0.0541835	0.346428	0.543154	0.420349	-0.239039	-0.0272573
SAP97_PI3K	-0.0631432	-0.0218337	-0.00564925	0.049785	-0.0282172	0.126477	0.0524715	0.002956	0.135911	-0.009901	0.124425
SAP97_FYN	-0.00659975	-0.0433847	-0.0098625	0.005008	-0.00115675	0.268483	-0.0493135	0.063911	0.00834825	-0.0212227	-0.0661107
SAP97_GLUR1	-0.00712825	0.104793	0.11647	0.126004	-0.0334465	0.0547877	0.0264895	0.0655918	0.111133	0.076821	0.108992
SAP97_GLUR2	0.040258	0.0829225	0.0121065	0.0998645	0.0054235	0.260464	-0.0720322	-0.104098	0.234387	-0.016032	-0.203349
SAP97_SYNGAP	0.0540783	0.166709	0.0809997	0.055675	-0.0226958	0.155337	0.0149292	0.0682072	0.11303	0.0262955	0.139781
SAP97_SAP97	0.0482703	0.0655785	0.0661723	-0.11506	-0.0531732	0.192683	-0.108439	-0.0955632	0.112007	0.046669	-0.319066
SAP97_UBE3A	0.0090075	0.112949	0.0605412	0.0785937	-0.0229677	0.0740675	-0.0268015	0.106235	0.168938	-0.046257	0.0268193
SAP97_NL3	-0.0169658	0.112904	0.00836	-0.009153	0.0001315	0.135428	0.0911125	0.170687	0.174759	-0.0015845	-0.0290882
UBE3A_PSD95	0.0822678	-0.0151247	-0.00228175	-0.0254988	0.0214732	0.00806025	0.053725	0.139898	0.0486575	-0.004837	-0.206397
UBE3A_NMDAR1	0.0372335	0.0130738	-0.0431038	0.0422495	-0.060541	-0.027798	0.0442185	0.0967733	-0.02046	-0.0854772	-0.262179
UBE3A_NMDAR2A	0.0271527	-0.0229	0.0179173	-0.0262857	-0.0064665	0.0119983	0.0701597	0.0641363	-0.0777083	-0.0338693	-0.102896
UBE3A_NMDAR2B	0.0309745	-0.0137973	0.0781957	0.0389752	0.00300325	-0.0129532	0.163806	0.011966	0.1391	-0.077466	-0.101621
UBE3A_MGLUR5	-0.094389	-0.157564	-0.0227847	-0.0128745	0.072653	0.0129905	0.117499	-0.029141	-0.005338	-0.101364	-0.156373
UBE3A_SHANK3	0.02106	0.084084	0.088879	0.0266608	0.072632	0.166571	0.178793	0.0756103	0.0246877	0.0651458	-0.598013
UBE3A_HOMER1	-0.035661	-0.022857	0.0085955	0.0503642	-0.0599995	1.12076	0.0895898	-0.00745175	0.032661	-0.0807278	-0.241412
UBE3A_HOMER1A	0.013628	0.0018	-0.00339925	0.0033525	0.015306	0.0145042	0.0706982	0.11353	0.056012	0.0357265	-0.133362
UBE3A_PI3K	-0.0777903	0.0162603	0.007275	0.0435588	-0.0353142	0.047511	0.0505183	0.00531525	-0.0350183	0.129944	0.00222025
UBE3A_FYN	0.0639138	0.0034605	-0.0122782	0.0100193	0.02781	-0.0582338	-0.038314	0.0593212	-0.0370015	-0.0358357	0.0118037
UBE3A_GLUR1	0.0285253	0.0101485	-0.0430495	0.0655068	-0.0382065	0.0846935	0.0152365	0.0338012	-0.175695	0.068264	0.0374865
UBE3A_GLUR2	0.00448725	0.0628897	0.0267775	0.049415	-0.0983368	-0.0852347	-0.04246	-0.0225905	0.0056335	-0.0302188	0.00839225
UBE3A_SYNGAP	0.0813895	0.022927	0.035746	0.05188	0.00721475	0.065474	-0.032472	0.00909225	0.0473965	0.0320498	0.124311
UBE3A_SAP97	-0.01572	0.0541458	0.0644295	0.0571528	-0.003466	-0.0511295	-0.070262	-0.0210443	-0.0164455	-0.0134755	-0.107755
UBE3A_UBE3A	-0.0418717	-0.051667	0.045574	0.10254	1.21872	0.779413	0.0324303	-0.171417	-0.248763	0.0268977	-0.007353
UBE3A_NL3	0.0755205	-0.01647	0.0370045	0.10199	-0.052102	-0.002414	0.100623	0.100431	0.135935	0.0117685	-0.156766
NL3_PSD95	0.0751997	-0.0127002	-0.0659203	0.0968008	-0.0374427	-0.131347	0.237003	0.260749	0.112781	-0.0710525	-0.22495
NL3_NMDAR1	0.175755	-0.048023	-0.0357285	-0.0239053	0.0360147	-0.033765	0.0145692	0.239952	0.0375263	-0.152689	-0.206775
NL3_NMDAR2A	0.106674	-0.0163222	0.0801945	-0.250837	0.0224057	-0.030093	0.0077935	0.079988	0.252044	-0.113625	-0.104153
NL3_NMDAR2B	0.125167	-0.00562333	0.149712	-0.108226	0.0725438	-0.0147655	0.050737	0.195137	0.102068	-0.036953	-0.120858
NL3_MGLUR5	-0.147305	-0.139927	0.0302958	-0.0156177	-0.0319222	-0.032107	-0.00613875	0.121879	0.17657	-0.297857	-0.0986935
NL3_SHANK3	-0.0900575	0.107084	0.11337	-0.00070175	0.0161113	0.26734	0.21801	0.121198	0.19378	0.195873	-0.248439
NL3_HOMER1	0.108734	0.0182822	0.142434	-0.135564	-0.025956	-0.0088205	0.0406043	0.10616	-0.0433645	-0.196699	-0.194697
NL3_HOMER1A	0.151937	0.0660128	-0.0385938	-0.137998	-0.119815	-0.027148	-0.005839	0.172761	0.111578	-0.139189	-0.133175
NL3_PI3K	-0.0223318	-0.0444428	0.0886457	0.0775193	0.0389955	-0.00746475	0.0307497	0.0456602	0.0735278	-0.0728222	0.0477
NL3_FYN	-0.0337812	-0.000956167	0.152778	-0.244818	0.10171	0.003612	0.0432425	0.0648575	0.14903	-0.114334	-0.0473353
NL3_GLUR1	-0.168948	0.0466333	0.108418	0.051691	0.00808325	0.120885	0.0289305	0.0956713	0.157219	0.0112535	0.0024585
NL3_GLUR2	-0.00583325	0.0114653	0.0855005	0.122511	-0.339654	-0.127185	0.001331	-0.079069	0.0220017	0.0185645	0.0094685
NL3_SYNGAP	0.073332	0.0740307	0.0208463	0.0531507	-0.0555773	0.0133402	-0.0349477	0.038766	0.04435	-0.0437775	0.0270705
NL3_SAP97	-0.0301635	-0.0167157	0.152916	0.0601217	-0.046585	-0.0011335	0.0442532	0.00026875	0.261221	0.0782357	-0.071979
NL3_UBE3A	0.150133	0.074029	0.207679	-0.00760075	-0.094361	-0.0908973	0.119794	0.132093	-0.078698	0.0502835	-0.0931017
NL3_NL3	0.0037515	-0.0340887	0.0319797	-0.0284395	0.0606893	-0.0344257	0.130021	0.171421	0.00768875	-0.139381	0.101099

## Sheet: Number of Hits
	Total Occurances	Glutamate Hit?		VPA Ctx	VPAHC	GPGCtx	GPGHC	BuxCtx	BuxHC	Ube3aCtx	Ube3aHC	FragileXCtx	TSC2Ctx	CNTNAP2
HOMER1_PSD95	4	yes		1	1	1	0	0	0	0	0	1	0	0
FYN_FYN	4			1	0	0	1	0	0	0	0	1	0	1
SYNGAP_SYNGAP	4	yes		0	0	0	0	1	1	0	0	0	1	1
PSD95_PSD95	3			1	0	0	1	1	0	0	0	0	0	0
HOMER1_NMDAR1	3	yes		0	1	1	0	0	0	0	0	1	0	0
SYNGAP_PSD95	3	yes		0	0	1	0	1	0	0	0	0	1	0
PSD95_SHANK3	2			0	0	0	1	0	0	0	1	0	0	0
NMDAR2B_NMDAR2B	2			0	1	0	0	0	0	0	0	0	1	0
HOMER1_MGLUR5	2	yes		0	1	0	0	0	0	0	1	0	0	0
PI3K_PI3K	2	yes		0	1	0	0	0	0	0	0	1	0	0
FYN_NL3	2			0	0	1	0	0	0	0	0	0	1	0
SYNGAP_NMDAR2A	2			0	1	0	0	0	1	0	0	0	0	0
SYNGAP_HOMER1A	2	yes		0	1	0	0	1	0	0	0	0	0	0
SAP97_NMDAR1	2			0	1	0	0	0	0	0	1	0	0	0
SAP97_HOMER1A	2			1	1	0	0	0	0	0	0	0	0	0
UBE3A_UBE3A	2			0	0	0	0	0	0	1	1	0	0	0
PSD95_GLUR1	1			0	0	0	1	0	0	0	0	0	0	0
NMDAR1_NMDAR1	1			0	1	0	0	0	0	0	0	0	0	0
NMDAR1_MGLUR5	1			0	0	0	1	0	0	0	0	0	0	0
NMDAR1_SHANK3	1			0	0	0	0	0	0	0	0	0	0	1
NMDAR2A_SHANK3	1			0	1	0	0	0	0	0	0	0	0	0
NMDAR2A_NL3	1			0	0	0	0	0	0	0	0	1	0	0
NMDAR2B_HOMER1A	1			0	0	0	0	0	0	0	0	0	0	1
NMDAR2B_NL3	1			0	0	0	0	0	0	0	0	1	0	0
MGLUR5_MGLUR5	1			0	0	0	0	0	0	0	1	0	0	0
SHANK3_SHANK3	1			0	0	1	0	0	0	0	0	0	0	0
SHANK3_NL3	1			1	0	0	0	0	0	0	0	0	0	0
HOMER1_NMDAR2B	1			0	1	0	0	0	0	0	0	0	0	0
HOMER1_HOMER1A	1			0	0	0	0	0	0	0	1	0	0	0
HOMER1_GLUR2	1			0	0	0	0	0	0	0	1	0	0	0
HOMER1_SYNGAP	1	yes		0	0	0	1	0	0	0	0	0	0	0
HOMER1_SAP97	1			0	0	0	0	0	0	0	0	0	1	0
HOMER1_UBE3A	1			0	1	0	0	0	0	0	0	0	0	0
PI3K_PSD95	1			0	1	0	0	0	0	0	0	0	0	0
PI3K_NMDAR1	1			0	1	0	0	0	0	0	0	0	0	0
PI3K_NMDAR2A	1			0	1	0	0	0	0	0	0	0	0	0
PI3K_MGLUR5	1			0	1	0	0	0	0	0	0	0	0	0
PI3K_HOMER1A	1			0	1	0	0	0	0	0	0	0	0	0
PI3K_GLUR2	1			0	0	0	0	0	1	0	0	0	0	0
PI3K_SYNGAP	1			0	0	0	0	0	1	0	0	0	0	0
PI3K_SAP97	1			0	0	0	0	0	1	0	0	0	0	0
FYN_SHANK3	1			0	0	0	0	1	0	0	0	0	0	0
GLUR1_PSD95	1			0	0	0	0	0	0	1	0	0	0	0
GLUR2_SHANK3	1			0	0	0	0	0	0	0	0	0	0	1
GLUR2_GLUR2	1			0	0	0	0	0	0	0	0	0	0	1
SYNGAP_NMDAR1	1	yes		0	0	0	0	1	0	0	0	0	0	0
SYNGAP_NMDAR2B	1			0	1	0	0	0	0	0	0	0	0	0
SYNGAP_MGLUR5	1			0	1	0	0	0	0	0	0	0	0	0
SYNGAP_GLUR2	1			0	0	0	0	0	1	0	0	0	0	0
SAP97_NMDAR2B	1			0	1	0	0	0	0	0	0	0	0	0
SAP97_MGLUR5	1			0	0	0	0	0	0	0	0	0	1	0
SAP97_SHANK3	1			0	0	0	0	0	0	0	1	0	0	0
SAP97_SAP97	1			0	0	0	0	0	0	0	0	0	0	1
UBE3A_MGLUR5	1			0	0	0	1	0	0	0	0	0	0	0
UBE3A_HOMER1	1			0	0	0	0	0	0	0	1	0	0	0
NL3_NMDAR2A	1			0	0	0	0	0	1	0	0	0	0	0
NL3_FYN	1			0	0	0	0	0	1	0	0	0	0	0
NL3_GLUR2	1			0	0	0	0	0	0	1	0	0	0	0
58
